# Supplementary material for: Stabilization of PIM Kinases in Hypoxia Is Mediated by the Deubiquitinase USP28
Source: MDPI journal article supplement (doi:10.3390/cells11061006), 2022-03-16
Supplement: s1 [file s1]

Article

# Stabilization of PIM Kinases in Hypoxia Is Mediated by the Deubiquitinase USP28

|                   |   |   |   |   |
|-------------------|---|---|---|---|
| 1% O <sub>2</sub> | - | - | + | + |
| Flag-FBW7         | + | + | + | + |
| HA-PIM2           | - | + | - | + |

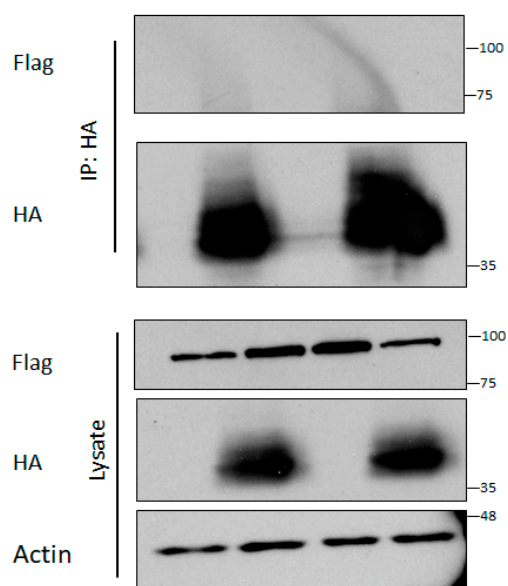

**Supplementary Figure S1.** PIM2 does not interact with FBW7. 293T cells were co-transfected with Flag-FBW7 and HA-PIM2 and cultured in normoxia or hypoxia for 6 h. HA-PIM2 was immunoprecipitated, and immunoprecipitated and input lysates were used for western blotting. Cells transfected with Flag-FBW7 alone were used as a negative control.
